# Supplementary figures and images for: Regulation of AMPA receptor surface trafficking and synaptic plasticity by a cognitive enhancer and antidepressant molecule
Source: PubMed Central journal article supplement — Mol Psychiatry. 2012 Jun 26;18(4):471–84. doi: 10.1038/mp.2012.80 (PMC3606944; doi:10.1038/mp.2012.80), 2012-06-26

# Suppl. Figure 1

Zhang et al.

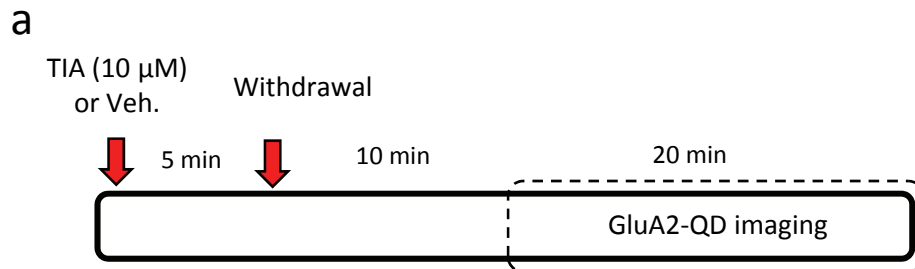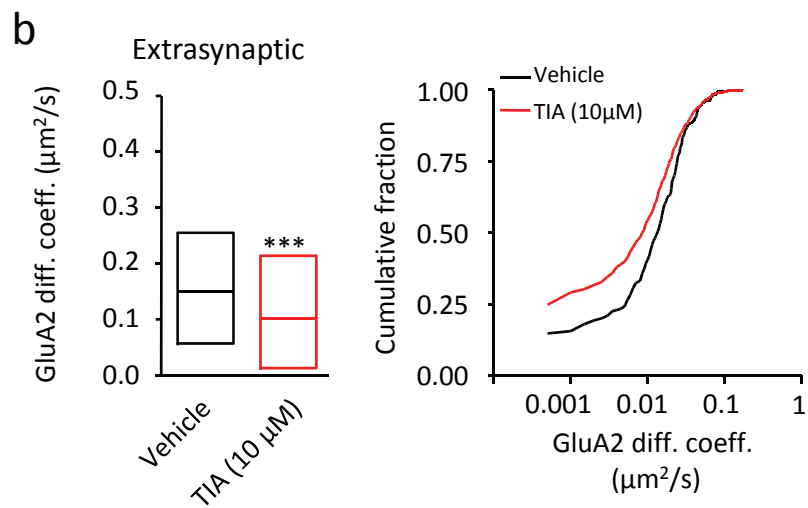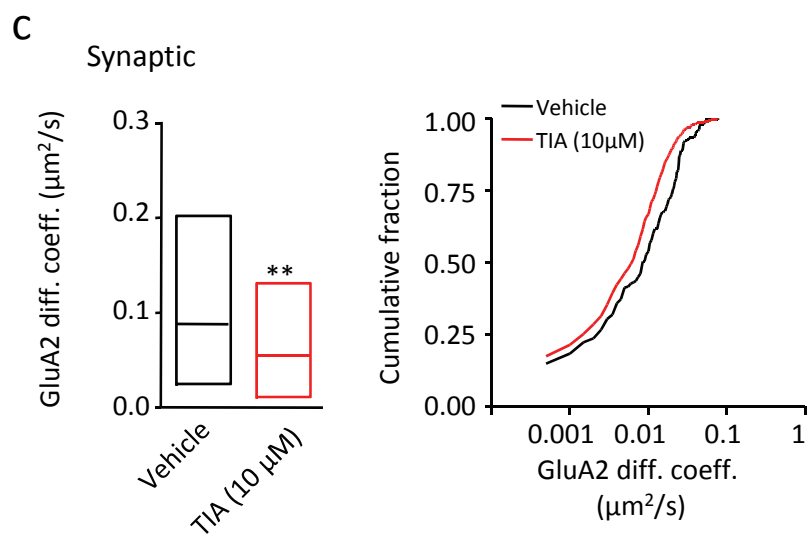

Supplement: mp201280x1.pdf [file mp201280x1.pdf]

# Suppl. Figure 2

Zhang et al.

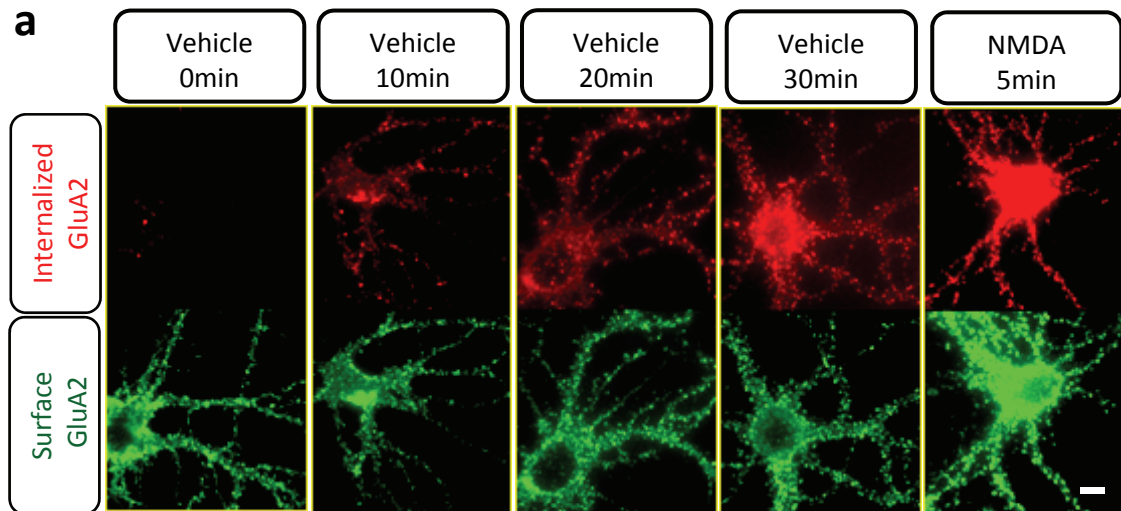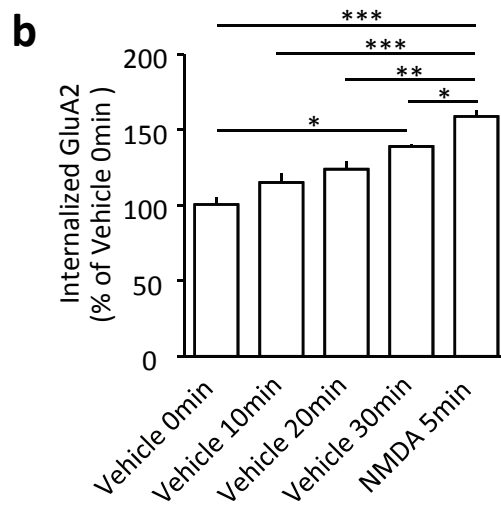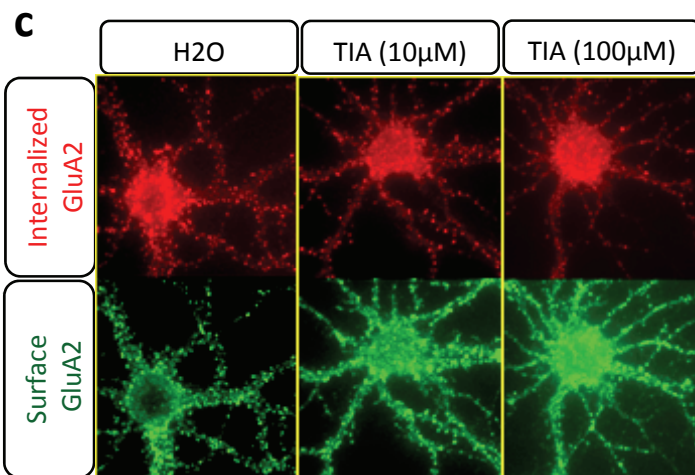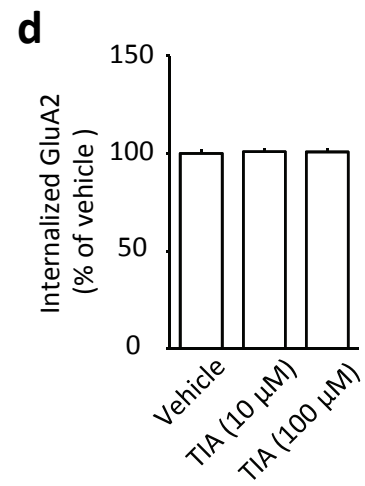

Supplement: mp201280x2.pdf [file mp201280x2.pdf]
